# Supplementary material for: Flexible chalcogenide perovskite Ba3Te2S7 with high electron mobility and strong optical absorption ability
Source: Royal Society of Chemistry journal article supplement (doi:10.1039/d3tc04221a), 2024-01-01
Supplement: d3tc04221a1.pdf [file d3tc04221a1.pdf]

## Supporting information for

# Flexible chalcogenide perovskite $\text{Ba}_3\text{Te}_2\text{S}_7$ with high electron mobility and strong optical absorption ability

Juan Du,<sup>a</sup> Jun-jie Shi,<sup>\*b</sup> Jin-xiang Deng,<sup>a</sup> and Cong-xin Xia<sup>\*c</sup>

The present supplemental material provides more details about the structural properties, electronic and optical properties of  $\text{Ba}_3\text{Te}_2\text{S}_7$ .

**Table S1** The average equatorial and axial Te-S-Te angles for monolayer (ML), two-layer (2L), three-layer (3L), four-layer (4L) and bulk  $\text{Ba}_3\text{Te}_2\text{S}_7$

| Layer                        | ML     | 2L     | 3L     | 4L     | Bulk   |
|------------------------------|--------|--------|--------|--------|--------|
| Equatorial Te-S-Te angle (°) | 136.31 | 168.11 | 148.14 | 151.56 | 153.37 |
| Axial Te-S-Te angle (°)      | 156.76 | 152.07 | 151.61 | 151.61 | 154.88 |

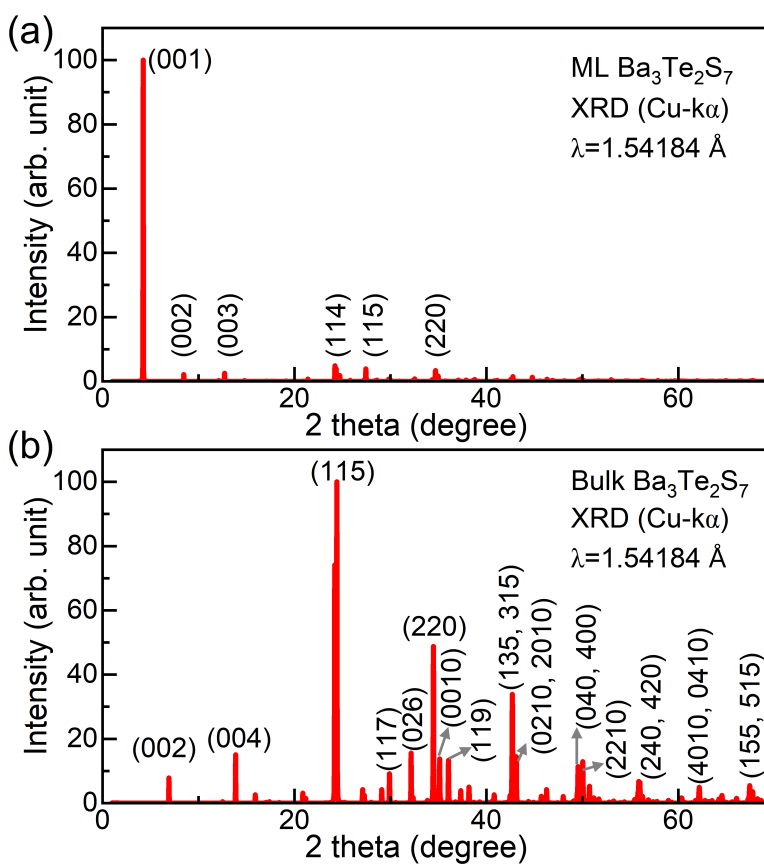

**Fig. S1** (a) The calculated XRD patterns for the relaxed (a) monolayer (ML) and (b) bulk  $\text{Ba}_3\text{Te}_2\text{S}_7$  from  $10^\circ$  to  $70^\circ$  by using the radiation wavelength  $\lambda = 1.54184 \text{ \AA}$  (Cu-K $\alpha$ ). Several important peaks are marked with the corresponding Miller indices ( $hkl$ ).

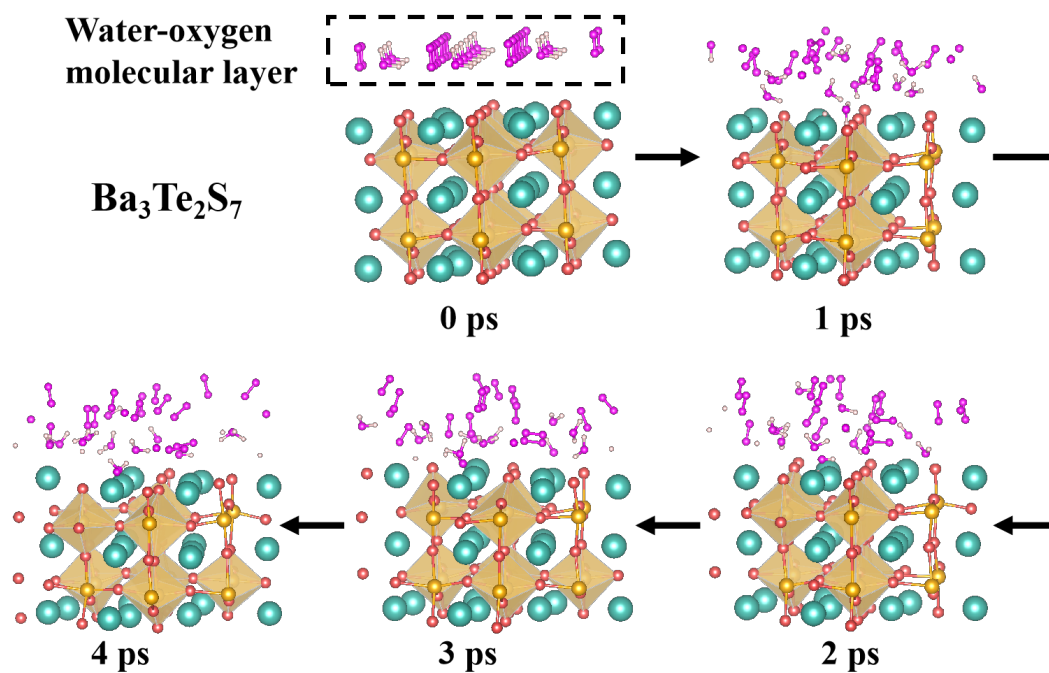

Fig. S2 Snapshots of AIMD trajectories of  $\text{Ba}_3\text{Te}_2\text{S}_7$  with a water-oxygen molecular layer following 4 ps AIMD simulation at 300 K.

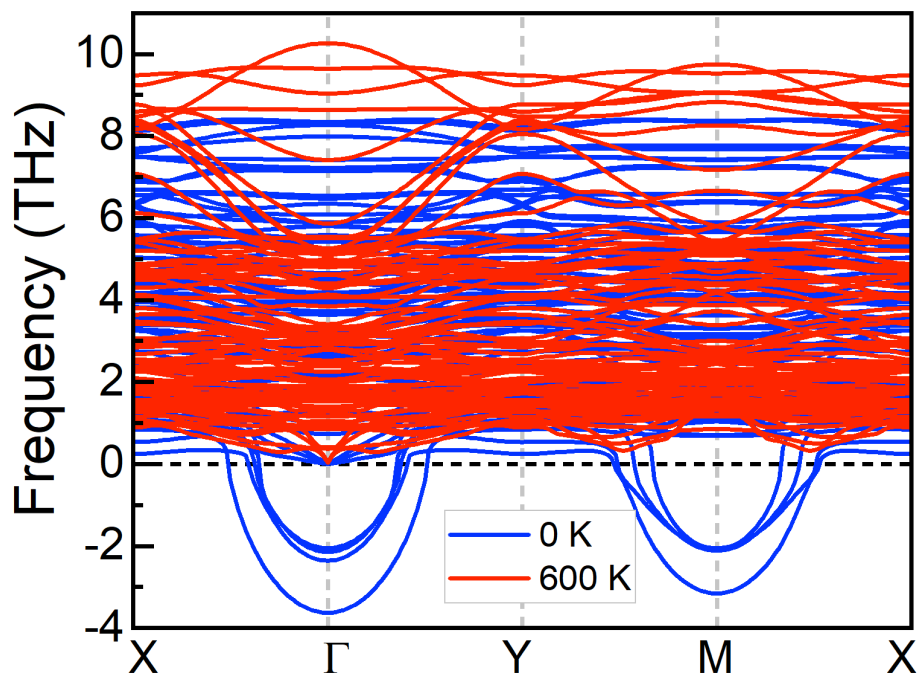

Fig. S3 Calculated phonon spectrum of  $\text{Ba}_3\text{Te}_2\text{S}_7$  at 0 K and 600 K.

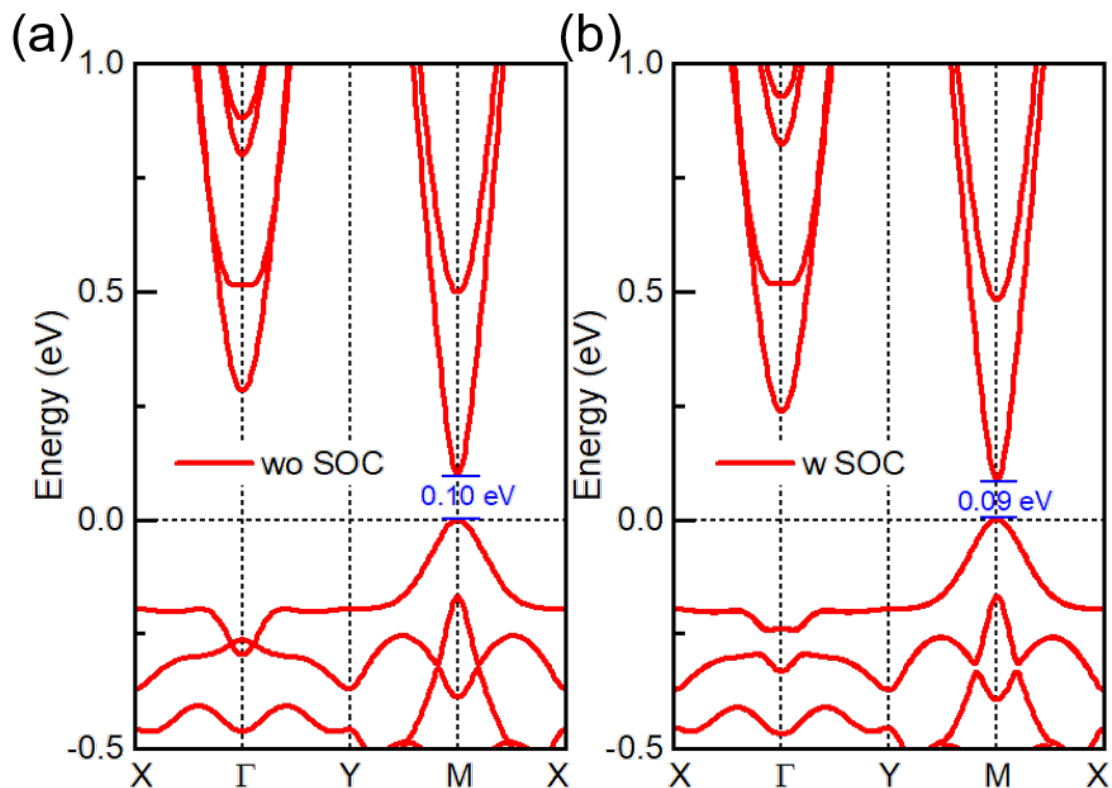

**Fig. S4** The computed band structure of ML Ba<sub>3</sub>Te<sub>2</sub>S<sub>7</sub> (a) without (wo) and (b) with (w) the spin-orbital coupling (SOC) effect using PBE functional. It is shown that the SOC effect has little influence on the band structure, except for a very small bandgap difference of 10 meV, which can be ignored indeed. Here X (0.5, 0.0, 0.0),  $\Gamma$  (0.0, 0.0, 0.0), Y (0.0, 0.5, 0.0) and M (0.5, 0.5, 0.0) refer to the special high-symmetry points in the first Brillouin zone. The top of the valence bands is chosen as the zero energy.

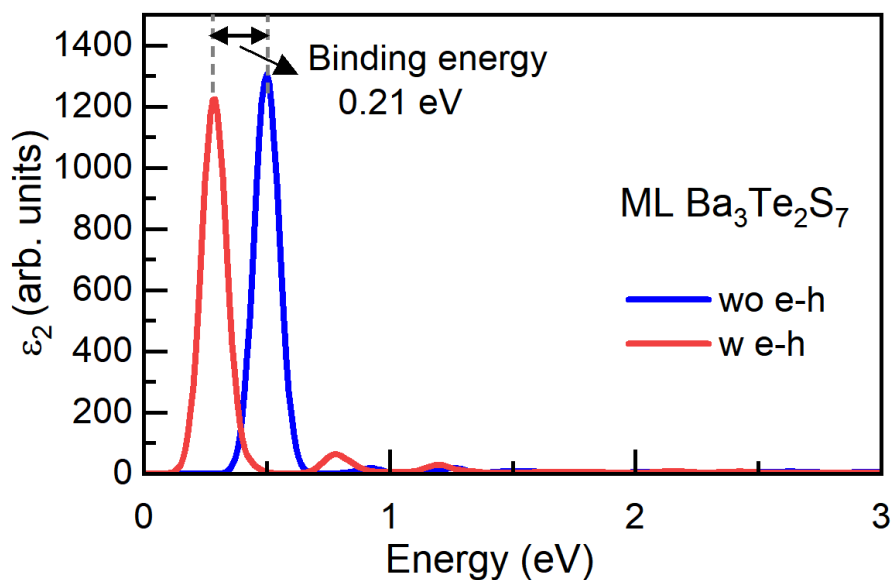

**Fig. S5** Calculated imaginary part of the dielectric function  $\epsilon_2$  for ML Ba<sub>3</sub>Te<sub>2</sub>S<sub>7</sub> with (w) and without (wo) the electron-hole (e-h) interaction. The exciton binding energy is estimated to be 0.21 eV.

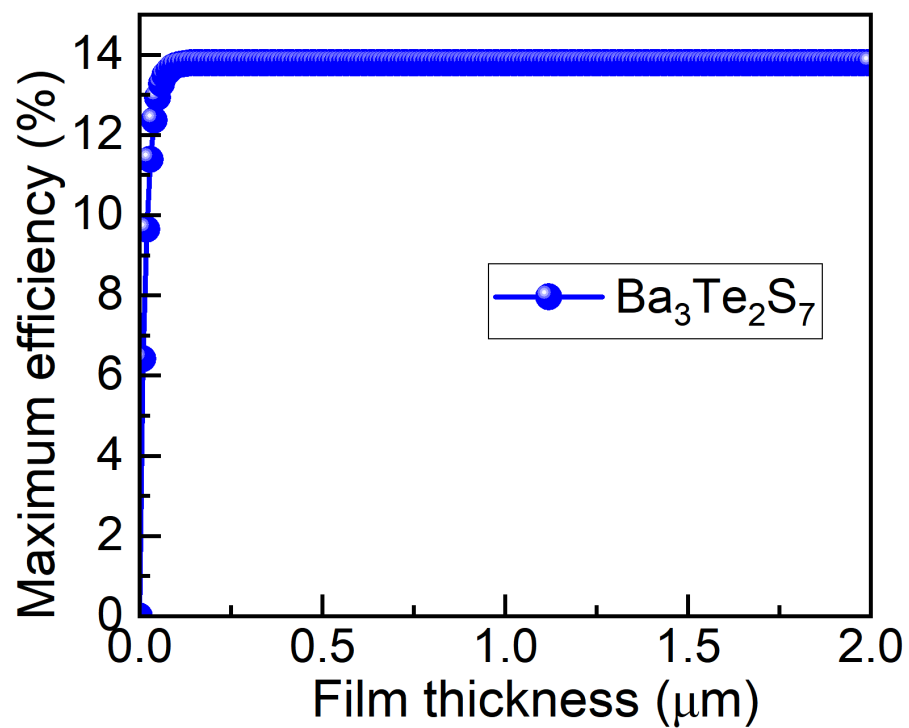

Fig. S6 The simulated maximum power conversion efficiency (PCE) of Ba<sub>3</sub>Te<sub>2</sub>S<sub>7</sub> as a function of the film thickness.
